# Supplementary material for: Urgent vs. planned peritoneal dialysis initiation: complications and outcomes in the first year of therapy
Source: PubMed Central journal article supplement (PMC9838670; doi:10.1590/2175-8239-jbn-2021-0182), 2022-04-04
Supplement: 2175-8239-jbn-2021-0182-suppl.pdf [file 2175-8239-jbn-2021-0182-suppl.pdf]

## Supplementary Material to “Urgent vs. planned peritoneal dialysis initiation: complications and outcomes in the first year of therapy”

**Table 1** – Catheter implantation and PD initiation.

| Variable                                 | All<br>(n=137) | US-PD<br>(n=70) | Plan-PD<br>(n=67) | p      |
|------------------------------------------|----------------|-----------------|-------------------|--------|
| <b>Previous HD, n (%)</b>                | 33 (24.1)      | 0 (0)           | 33 (49.2)         | <0.001 |
| <b>Implantation technique, n %</b>       |                |                 |                   | 0.27   |
| Seldinger                                | 77 (56.2)      | 44 (62.9)       | 33 (49.3)         |        |
| Laparotomy                               | 42 (30.7)      | 18 (25.7)       | 24 (35.8)         |        |
| Laparoscopy                              | 18 (13.1)      | 8 (11,4)        | 10 (14.9)         |        |
| <b>First-fill volume, mL (mean ± SD)</b> | 1,868 (±206)   | 1,874 (±168)    | 1,854 (±244)      | 0.59   |

US-PD: urgent-start peritoneal dialysis, Plan-PD: planned peritoneal dialysis, HD: hemodialysis, SD: standard deviation.
